# Supplementary material for: Crystallization behavior of polyvinylidene fluoride (PVDF) in NMP/DMF solvents: a molecular dynamics study
Source: Royal Society of Chemistry journal article supplement (doi:10.1039/d3ra00549f), 2023-01-01
Supplement: d3ra00549f1.pdf [file d3ra00549f1.pdf]

# **Supporting Information: Crystallization behavior of polyvinylidene fluoride (PVDF) in NMP/DMF solvents : a molecular dynamics study**

**Anseong Park,<sup>a</sup> Je-Yeon Jung,<sup>a</sup> Seungtae Kim,<sup>a</sup> WooJin Kim,<sup>b</sup> Min  
Young Seo,<sup>b</sup> Sangdeok Kim,<sup>a</sup> YongJoo Kim,<sup>\*b</sup> Won Bo Lee,<sup>\*a</sup>**

<sup>a</sup>School of Chemical and Biological Engineering and Institute of Chemical Processes,  
Seoul National University, Seoul 08826, Republic of Korea. Tel: +82 (0)2 880 1529;  
E-mail: wblee@snu.ac.kr

<sup>b</sup>School of Advanced Materials Engineering, KookMin University, Seoul 02707,  
Republic of Korea. Tel: +82 (0)2 910 4685; E-mail: cyyjee@kookmin.ac.kr

**Table S1** Number of molecules in each simulated system.

| NMP  | PVDF | wt %  | DMF  | PVDF | wt %  |
|------|------|-------|------|------|-------|
| 1030 | 216  | 67.06 | 1395 | 216  | 67.09 |
| 1030 | 162  | 60.42 | 1395 | 162  | 60.46 |
| 1030 | 108  | 50.44 | 1395 | 108  | 50.48 |
| 1030 | 90   | 45.90 | 1395 | 90   | 45.93 |
| 1030 | 72   | 40.43 | 1395 | 72   | 40.46 |
| 1030 | 54   | 33.73 | 1395 | 54   | 33.76 |
| 1030 | 40   | 27.38 | 1395 | 40   | 27.41 |
| 1030 | 25   | 19.07 | 1395 | 25   | 19.09 |
| 1030 | 11   | 9.40  | 1395 | 11   | 9.40  |

**11PVDF (9 wt%)**

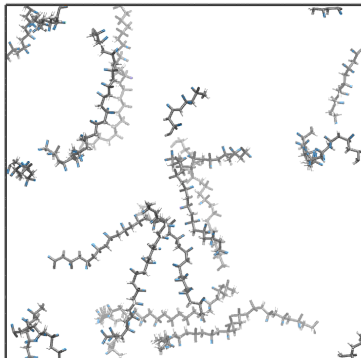

**25PVDF (19 wt%)**

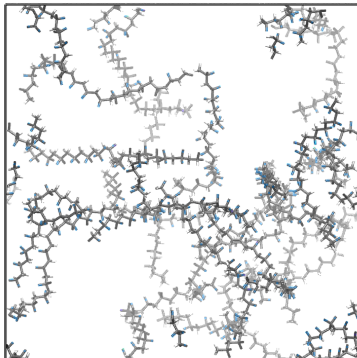

**40PVDF (27 wt%)**

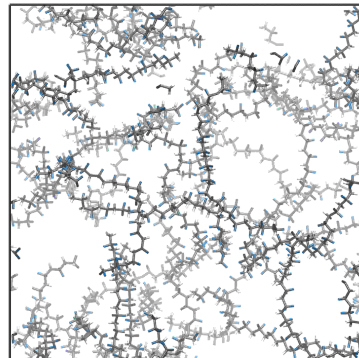

**54PVDF (34 wt%)**

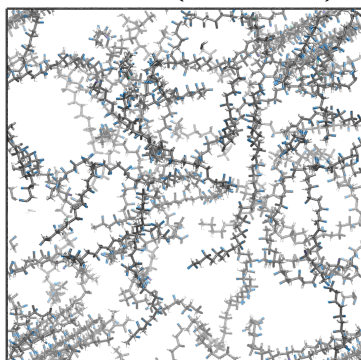

**72PVDF (40 wt%)**

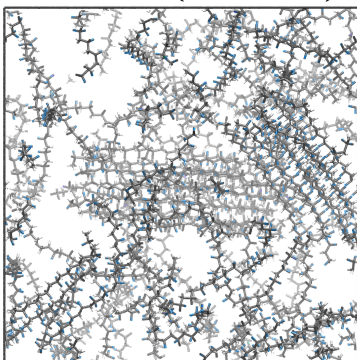

**90PVDF (46 wt%)**

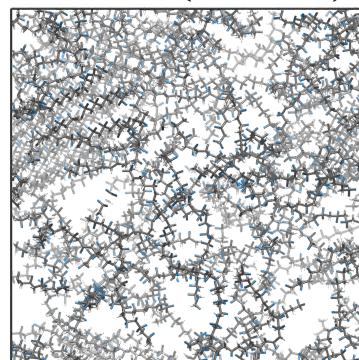

**108PVDF (50 wt%)**

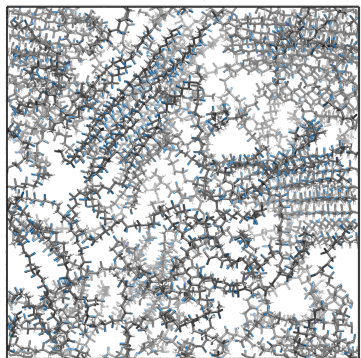

**162PVDF (60 wt%)**

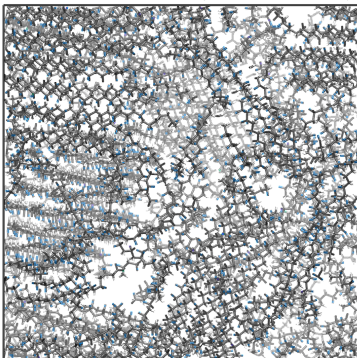

**216PVDF (67 wt%)**

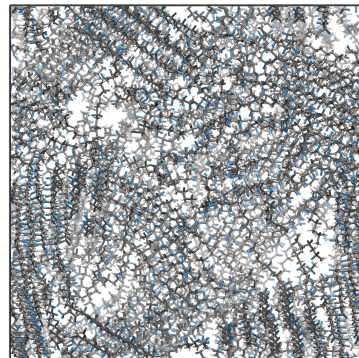

**Figure S1** Simulation snapshots of varying PVDF wt% in NMP solvent.

**11PVDF (9 wt%)**

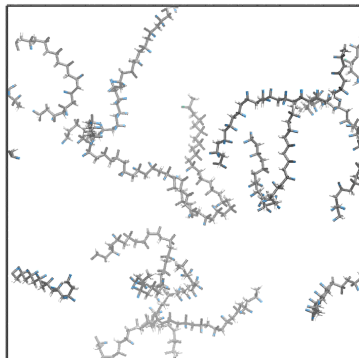

**25PVDF (19 wt%)**

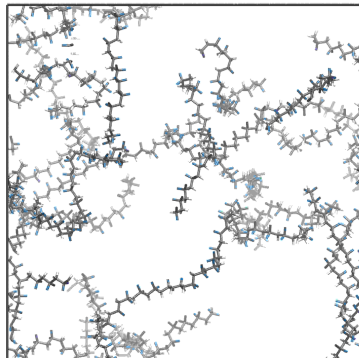

**40PVDF (27 wt%)**

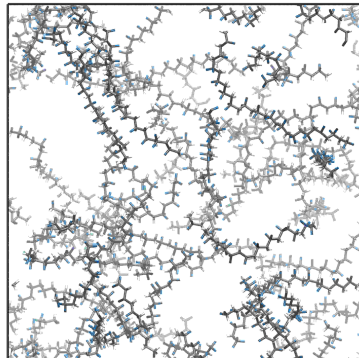

**54PVDF (34 wt%)**

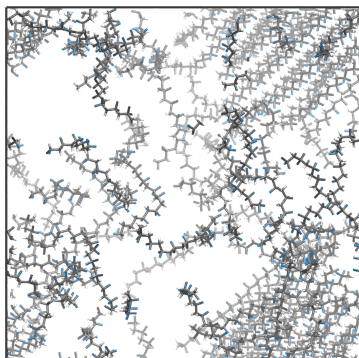

**72PVDF (40 wt%)**

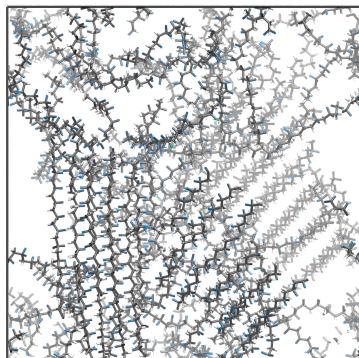

**90PVDF (46 wt%)**

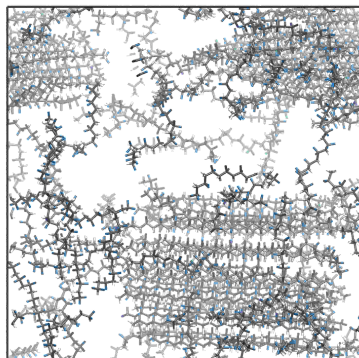

**108PVDF (50 wt%)**

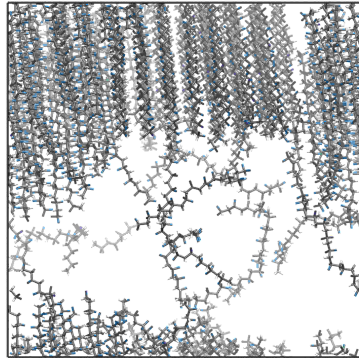

**162PVDF (60 wt%)**

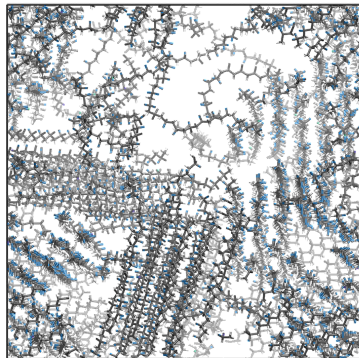

**216PVDF (67 wt%)**

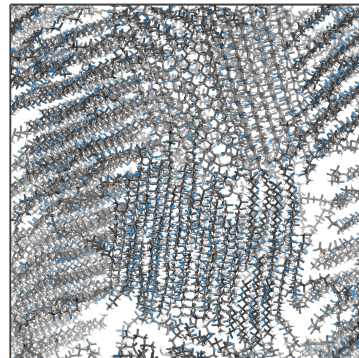

**Figure S2** Simulation snapshots of varying PVDF wt% in DMF solvent.



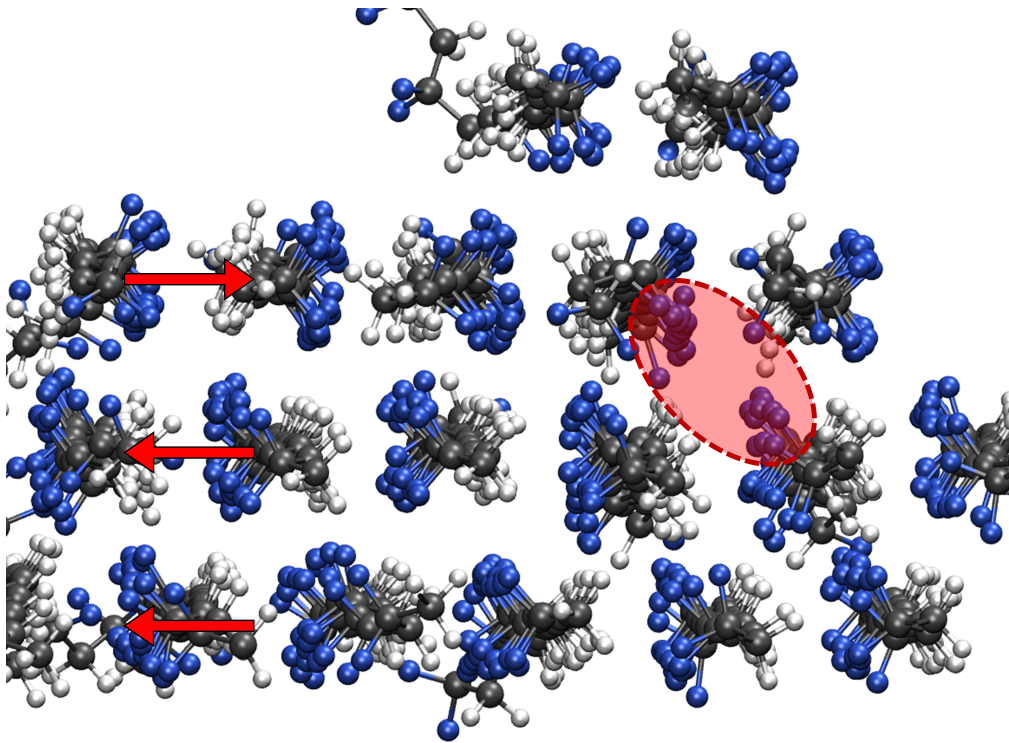

**Figure S3** Simulation snapshot of aligned  $\beta$  phase PVDF chains at 34 wt% of PVDF in DMF.

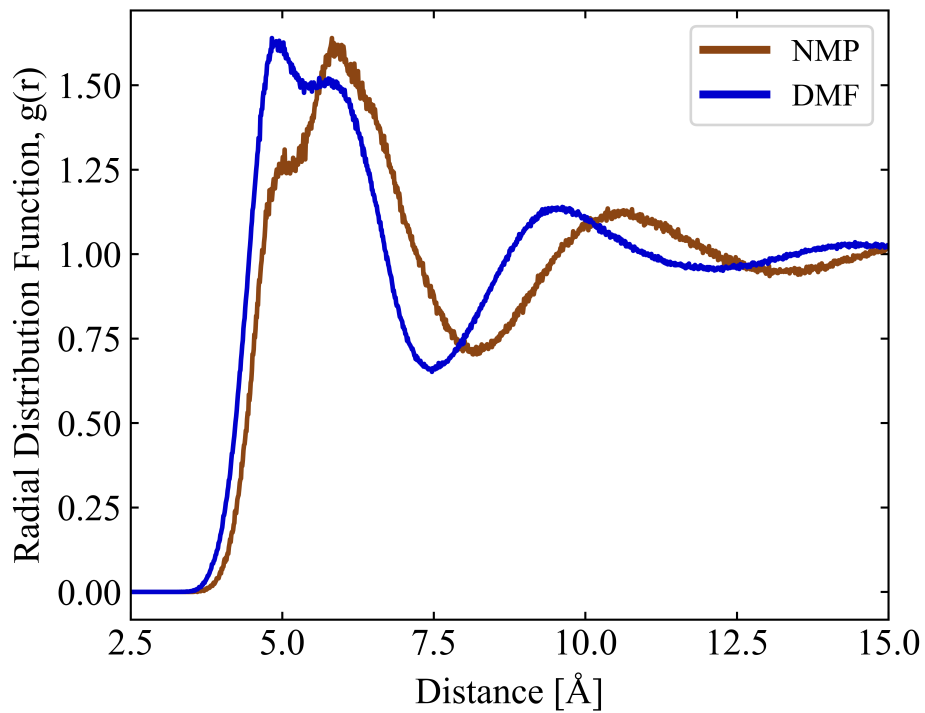

**Figure S4** Radial distribution functions of NMP-NMP and DMF-DMF.

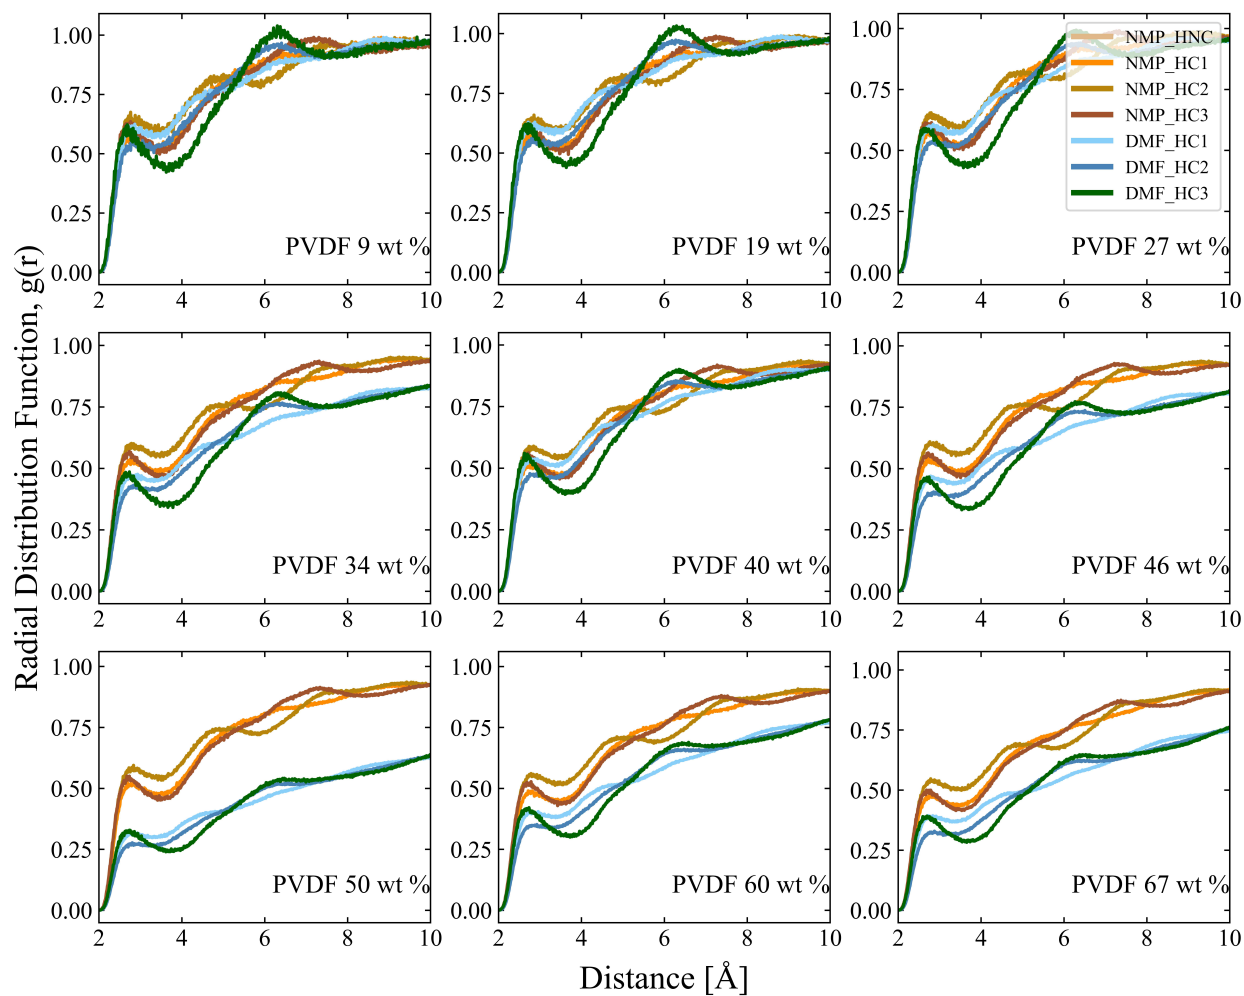

**Figure S5** Radial distribution function of PVDF fluorine and solvent hydrogen atom groups. Plots are shown in order of increasing PVDF wt%.

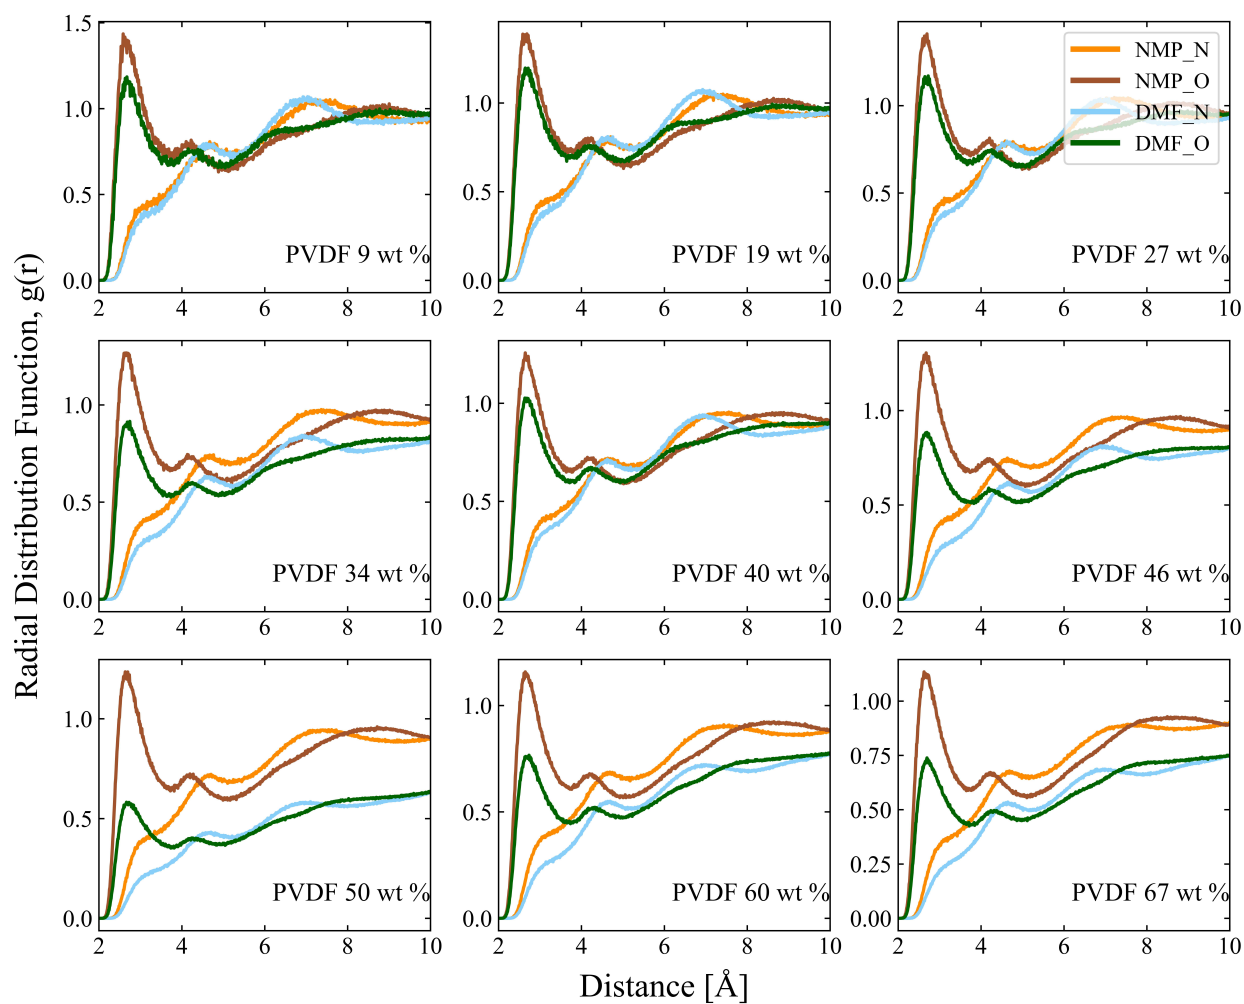

**Figure S6** Radial distribution function of PVDF hydrogen groups and solvent N/O atoms. Plots are shown in order of increasing PVDF wt%.

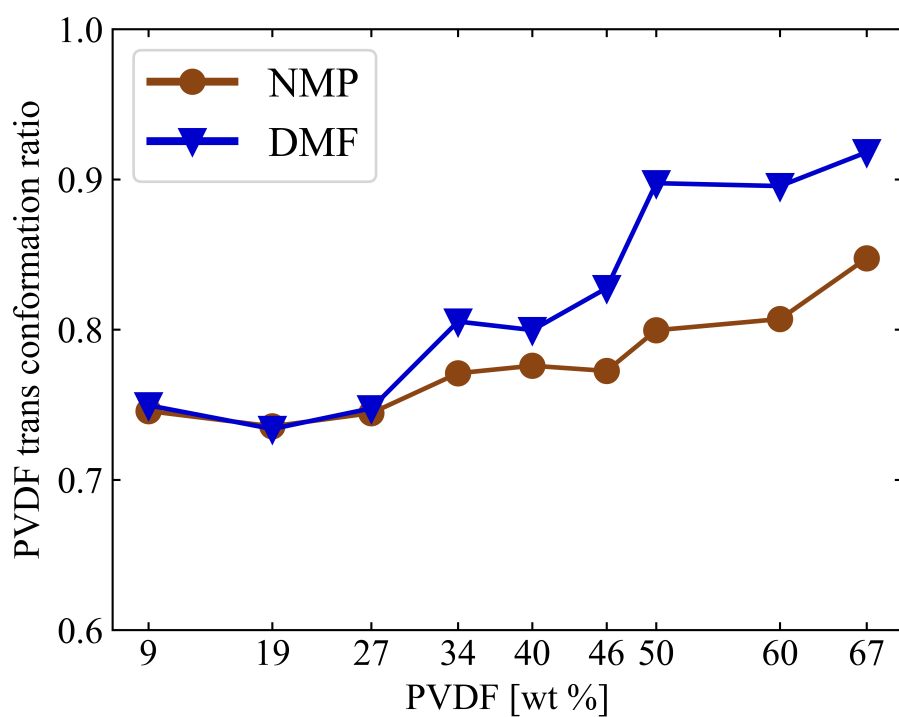

**Figure S7** Ratio of *trans* structure PVDF within 3.8 Å from NMP and DMF, respectively.
